# Supplementary material
Source: Research Square preprint supplement (doi:10.21203/rs.3.rs-9535798/v1)
Supplement: Supplementary file 1 [file 85c663a490f3cb1a1ce93ade.docx]

**STING Beyond Immunity: Tumour-Intrinsic Roles in Breast Cancer Progression and Metastasis**

**Authors:** Vaibhavi Joshi1, Kate Beecher1, Pascal HG Duijf2, Andrew Stacey1,3, Sam Druskovich1,3, Sarah Reed1, Peter T Simpson1,4, Sunil R Lakhani1,3, Amy E McCart Reed1,*

**Author Affiliations:**

1Frazer Institute, Faculty of Health, Medicine and Behavioural Sciences, The University of Queensland, Australia

2Centre for Cancer Biology, Clinical and Health Sciences, Adelaide University & SA Pathology, Australia

3Pathology Queensland, Royal Brisbane and Women’s Hospital, Australia

4School of Biomedical Sciences, Faculty of Health, Medicine and Behavioural Sciences, The University of Queensland, Australia

***Corresponding author:**

Amy E McCart Reed, Frazer Institute, Faculty of Health, Medicine and Behavioural Sciences, The University of Queensland, Brisbane 4029, Australia. Email: [amy.reed@uq.edu.au](mailto:amy.reed@uq.edu.au)

**Running title:** STING Beyond Immunity in Breast Cancer

**Keywords:** STING, breast cancer, brain metastasis, tumour intrinsic, biomarker

**Conflict of interest statement:** The authors declare no potential conflicts of interest.

**Western Blot Supplementary file**

Unedited blots for STING (target, ~42 kDa) and Vinculin (housekeeping/loading control, ~124 kDa). Membranes were cut horizontally at the 70 kDa marker to allow simultaneous detection of both proteins. STING was detected on the lower membrane section (45–70 kDa) and Vinculin on the upper section (70–210 kDa. Primary antibodies: anti-STING [1:1000; Cell Signaling Technology, clone D2P2F; #13647], anti-Vinculin [1:1000; Sigma-Aldrich; #V9131]. Detection: [ECL/fluorescent].


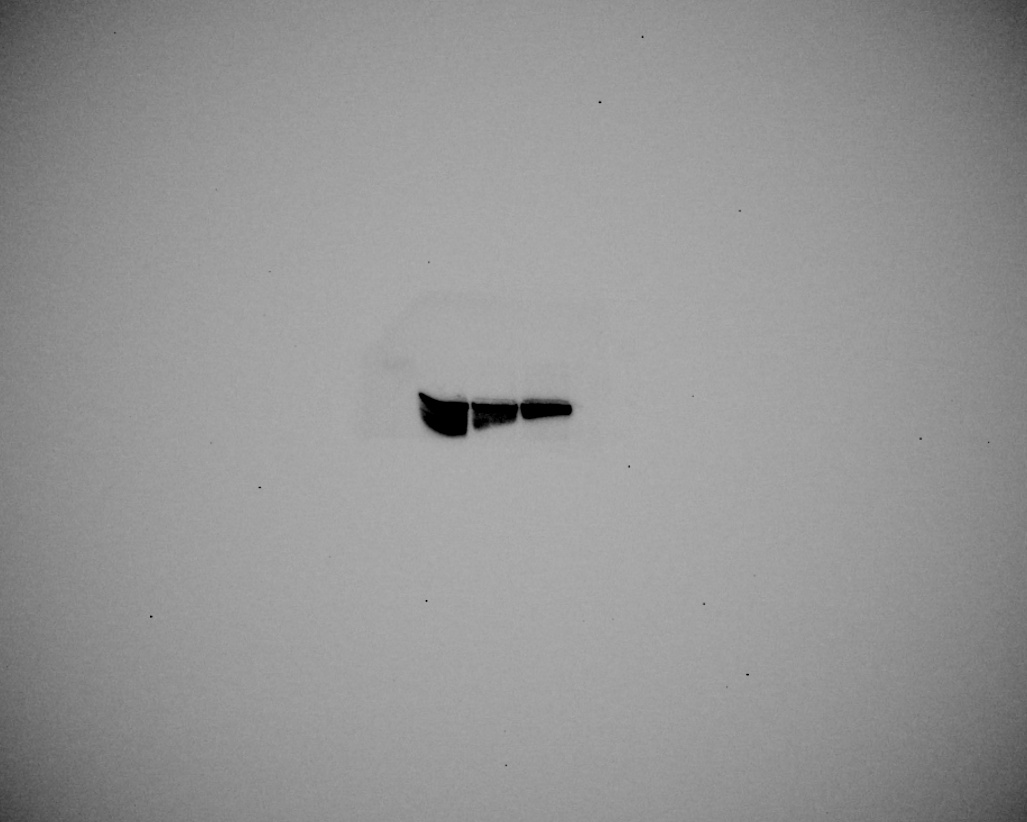

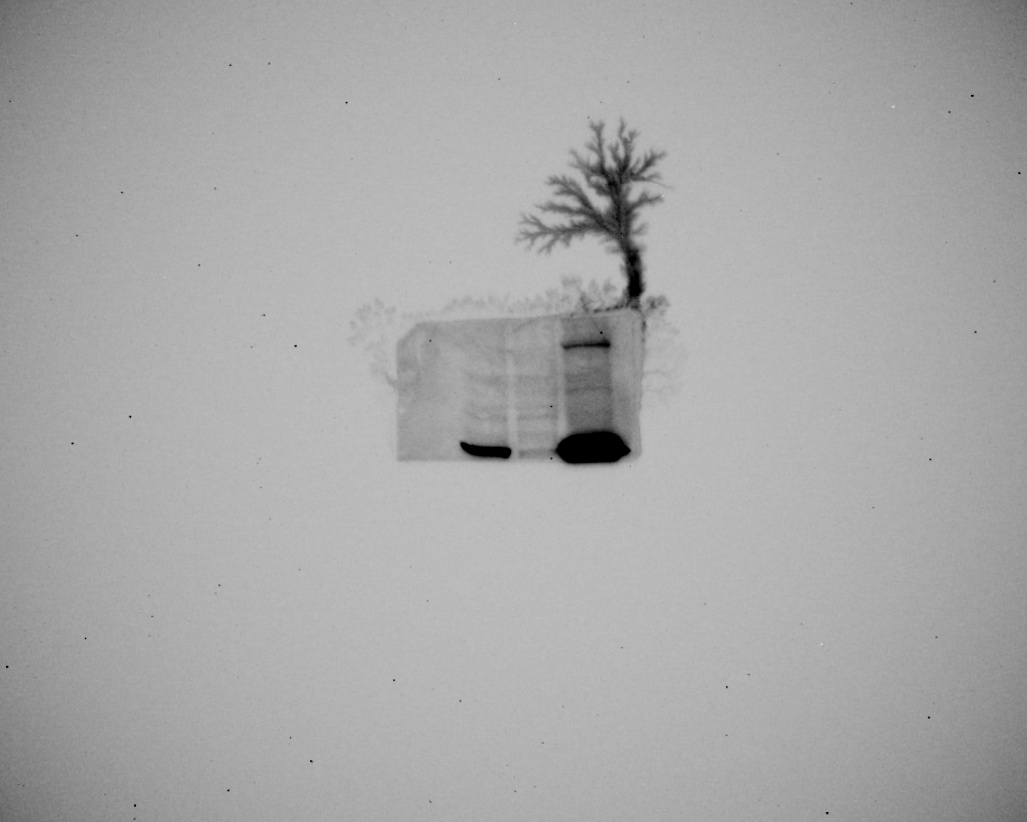


1: MDA-MB-231 Control

2: MDA-MB-231 shSTING (STING-low)

3: MDA-MB-231 STING high

1

2

3

Vinculin

STING
